# Supplementary material for: Novel Phthalazin-1(2H)-One Derivatives Displaying a Dithiocarbamate Moiety as Potential Anticancer Agents
Source: MDPI journal article supplement (doi:10.3390/molecules27238115), 2022-11-22

# Supplementary Materials

## Novel phthalazin-1(2H)-one derivatives displaying a dithiocarbamate moiety as potential anticancer agents

### Table of contents

#### Results and discussion

Table S1. CYP450 inhibition profile of compounds **6e**, **8e**, **6g**, **9a-b**, **9d** and **9g** 1

Table S2. Toxicity model profile of compounds **6e**, **8e**, **6g**, **9a-b**, **9d** and **9g** 2

#### Materials and Methods

#### Chemical synthesis

Synthesis of 2-(2-bromoethyl)phthalazinones **15-17** 2

<sup>1</sup>H NMR and <sup>13</sup>C NMR spectra of compounds **6-9** 3

Table S1. CYP450 inhibition predicted by SwissADME for compounds **6e**, **8e**, **6g**, **9a-b**, **9d**, and **9g**.

| Compound  | CYP1A2 | CYP2C19 | CYP2C9 | CYP2D6 | CYP3A4 |
|-----------|--------|---------|--------|--------|--------|
| <b>6e</b> | Yes    | Yes     | Yes    | No     | Yes    |
| <b>8e</b> | Yes    | Yes     | Yes    | No     | Yes    |
| <b>6g</b> | Yes    | Yes     | Yes    | No     | No     |
| <b>9a</b> | Yes    | Yes     | Yes    | No     | Yes    |
| <b>9b</b> | Yes    | Yes     | Yes    | No     | Yes    |
| <b>9d</b> | Yes    | Yes     | Yes    | No     | Yes    |
| <b>9g</b> | Yes    | Yes     | Yes    | No     | No     |

Table S2. Toxicity model predicted by ProTox-II for compounds **6e**, **8e**, **6g**, **9a-b**, **9d**, and **9g**.

| Compound  | Hepatotoxicity<br>Probability | Carcinogenicity<br>Probability | Immunotoxicity<br>Probability | Mutagenicity<br>Probability | Cytotoxicity<br>Probability |
|-----------|-------------------------------|--------------------------------|-------------------------------|-----------------------------|-----------------------------|
| <b>6e</b> | Inactive<br>0.56              | Inactive<br>0.55               | Inactive<br>0.80              | Inactive<br>0.53            | Inactive<br>0.67            |
| <b>8e</b> | Inactive<br>0.58              | Inactive<br>0.56               | Inactive<br>0.98              | Inactive<br>0.51            | Inactive<br>0.67            |
| <b>6g</b> | Inactive<br>0.54              | Active<br>0.53                 | Inactive<br>0.84              | Inactive<br>0.53            | Inactive<br>0.72            |
| <b>9a</b> | Inactive<br>0.57              | Active<br>0.53                 | Inactive<br>0.98              | Inactive<br>0.51            | Inactive<br>0.71            |
| <b>9b</b> | Inactive<br>0.58              | Active<br>0.53                 | Inactive<br>0.99              | Inactive<br>0.51            | Inactive<br>0.71            |
| <b>9d</b> | Inactive<br>0.58              | Inactive<br>0.57               | Inactive<br>0.93              | Inactive<br>0.52            | Inactive<br>0.6             |
| <b>9g</b> | Inactive<br>0.55              | Active<br>0.53                 | Inactive<br>0.92              | Inactive<br>0.51            | Inactive<br>0.72            |

## Materials and Methods

### Chemical synthesis

#### General procedure for the preparation of 2-(2-bromoethyl)phthalazin-1(2H)-ones (**15-17**)

To a solution of phthalazinone **12-14** (2 mmol) in DMF (20 mL) was added K<sub>2</sub>CO<sub>3</sub> (8 mmol) and 1,2-dibromoethane (12 mmol). The reaction mixture was stirred at 60 °C for 1.5 h and the solvent was evaporated to dryness. The residue was purified by column chromatography on silica gel (hexane/EtOAc, 5:1) to afford the desired compound.

*2-(2-Bromoethyl)phthalazin-1(2H)-one (15)*. White solid; yield: 50%; R<sub>f</sub> = 0.4 (hexane/EtOAc, 1:1); <sup>1</sup>H NMR (CDCl<sub>3</sub>): δ = 8.43 (d, 1H, *J* = 7.7 Hz, H8), 8.18 (s, 1H, H4), 7.85-7.76 (m, 2H, H6, H7), 7.71 (d, 1H, *J* = 7.3 Hz, H5), 4.63 (t, 2H, *J* = 6.8 Hz, H1'), 3.77 (t, 2H, *J* = 6.8 Hz, H2'); <sup>13</sup>C NMR (CDCl<sub>3</sub>): δ = 159.6 (C1), 138.3, 133.5, 132.0, 129.8, 127.9, 126.9 (C8), 126.3, 52.2 (C1'), 28.6 (C2'); HRMS (ESI): *m/z* [M+H]<sup>+</sup> calcd for C<sub>10</sub>H<sub>10</sub>BrN<sub>2</sub>O: 252.99710, found: 252.99790.

*2-(2-Bromoethyl)-4-p-tolylphthalazin-1(2H)-one (16)*. White solid; yield: 75%; R<sub>f</sub> = 0.4 (hexane/EtOAc, 1:1); <sup>1</sup>H NMR (CDCl<sub>3</sub>): δ = 8.53 (d, 1H, *J* = 7.1 Hz, H8), 7.82-7.75 (m, 3H, H5,

H6, H7), 7.49 (d, 2H,  $J = 7.9$  Hz, Ar), 7.34 (d, 2H,  $J = 7.9$  Hz, Ar), 4.69 (t, 2H,  $J = 7.0$  Hz, H1'), 3.80 (t, 2H,  $J = 7.0$  Hz, H2'), 2.46 (s, 3H, CH<sub>3</sub>); <sup>13</sup>C NMR (CDCl<sub>3</sub>):  $\delta$  = 159.3 (C1), 147.7, 139.5, 133.1, 132.1, 131.6, 129.5, 129.4, 129.3, 128.2, 127.4, 127.0, 52.1 (C1'), 28.5 (C2'), 21.5 (CH<sub>3</sub>); HRMS (ESI):  $m/z$  [M+H]<sup>+</sup> calcd for C<sub>17</sub>H<sub>16</sub>BrN<sub>2</sub>O: 343.04405, found: 343.04401.

*2-(2-Bromoethyl)-4-methylphthalazin-1(2H)-one* (**17**). White solid; yield: 45%;  $R_f$  = 0.4 (hexane/EtOAc, 1:1); <sup>1</sup>H NMR (CDCl<sub>3</sub>):  $\delta$  = 8.45-8.41 (m, 1H, H8), 7.83-7.72 (m, 3H, H5, H6, H7), 4.56 (t, 2H,  $J = 7.0$  Hz, H1'), 3.73 (t, 2H,  $J = 7.0$  Hz, H2'), 2.57 (s, 3H, CH<sub>3</sub>); <sup>13</sup>C NMR (CDCl<sub>3</sub>):  $\delta$  = 159.4 (C1), 144.1 (C4), 133.2, 131.5, 129.9, 127.7, 127.2, 125.0, 51.8 (C1'), 28.5 (C2'), 19.0 (CH<sub>3</sub>); HRMS (ESI):  $m/z$  [M+H]<sup>+</sup> calcd for C<sub>11</sub>H<sub>12</sub>BrN<sub>2</sub>O: 267.01275, found: 267.01300.

### <sup>1</sup>H NMR and <sup>13</sup>C NMR spectra of compounds 6-9

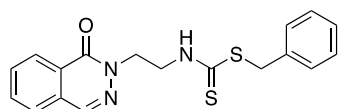

**6a**

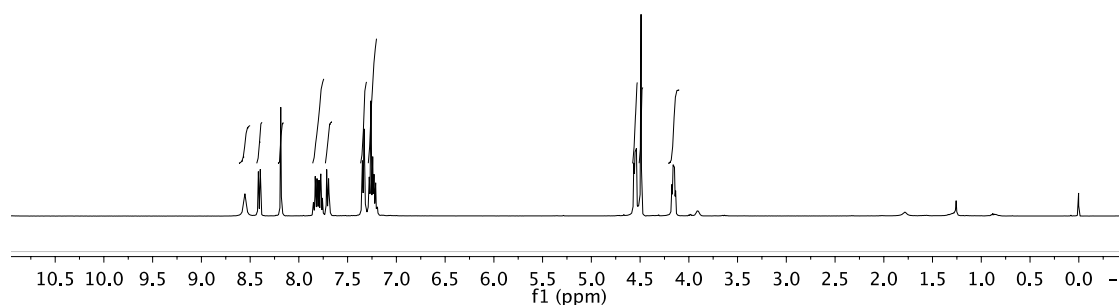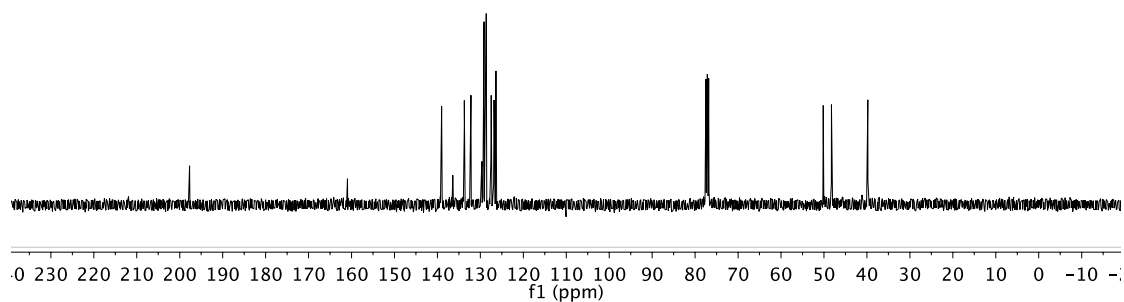

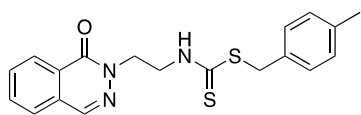

**6b**

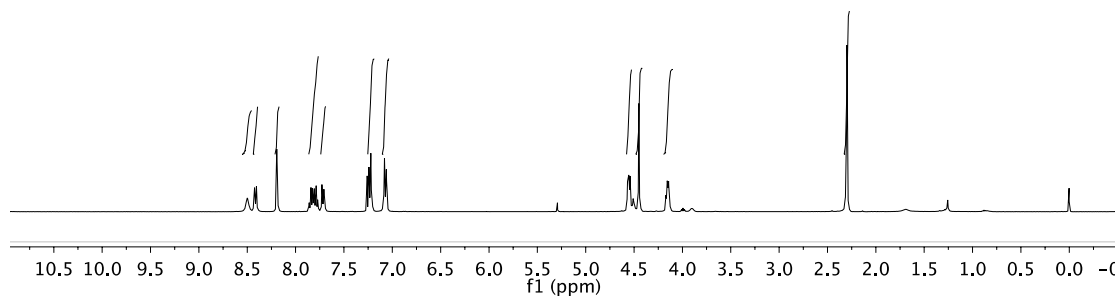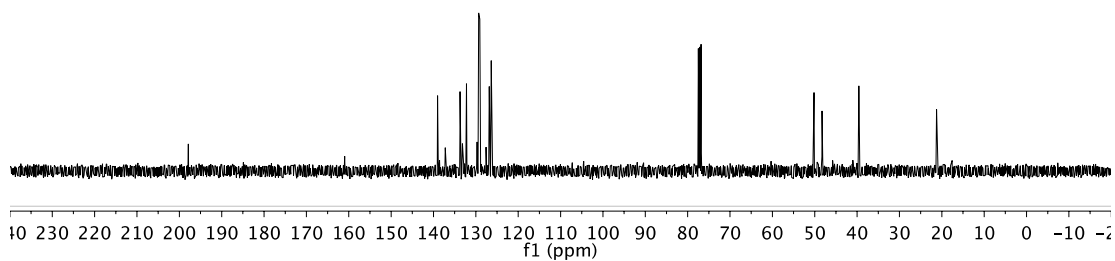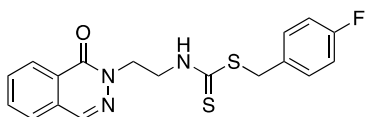

**6c**

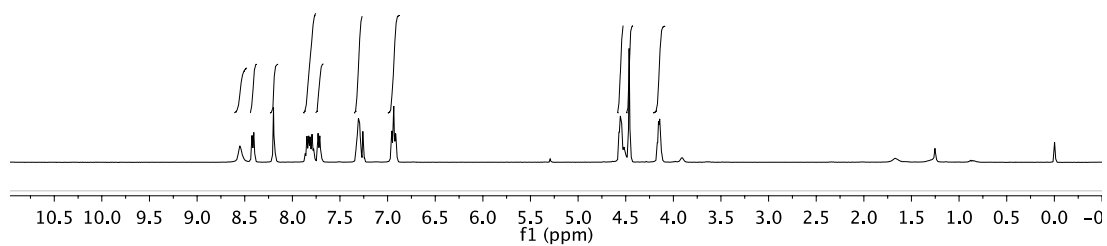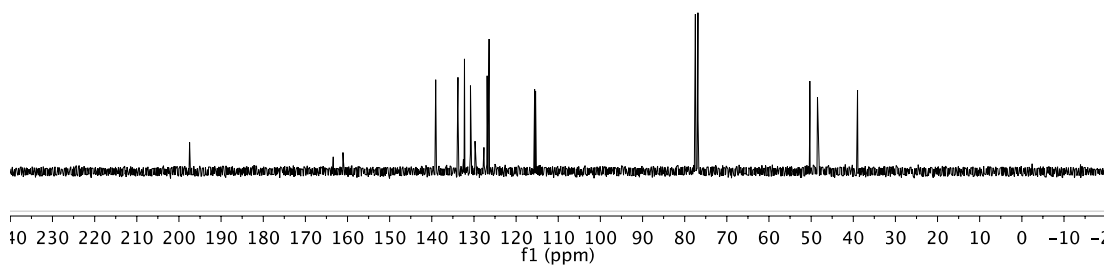

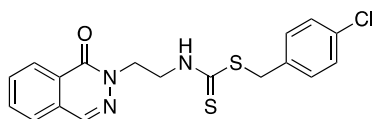

**6d**

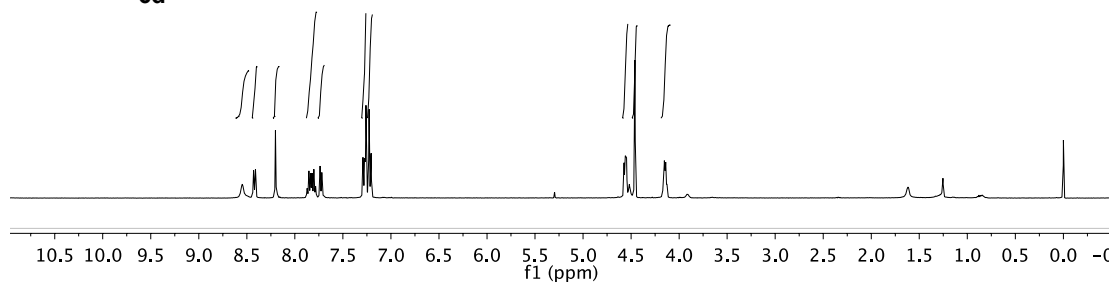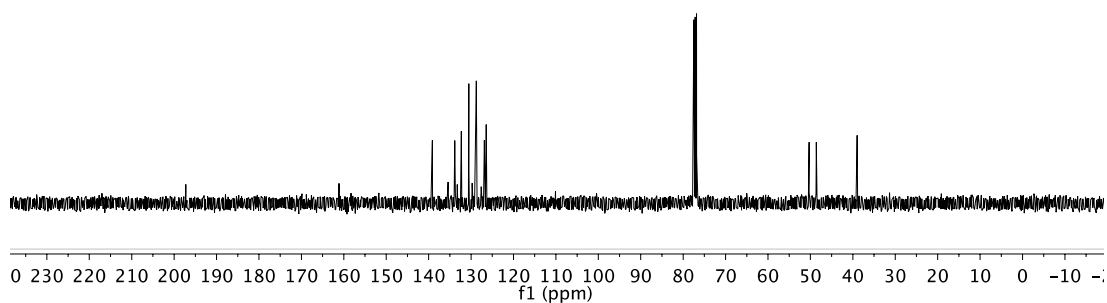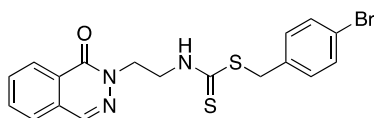

**6e**

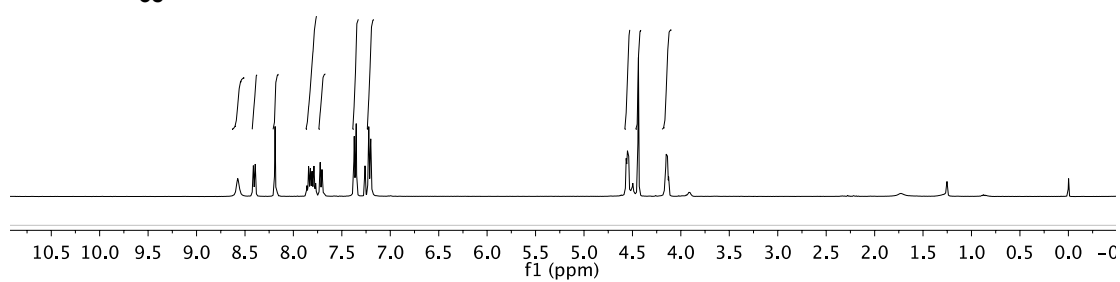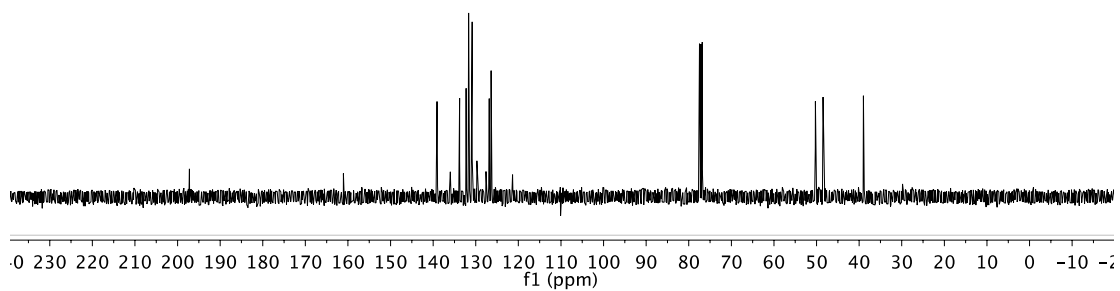

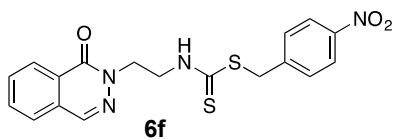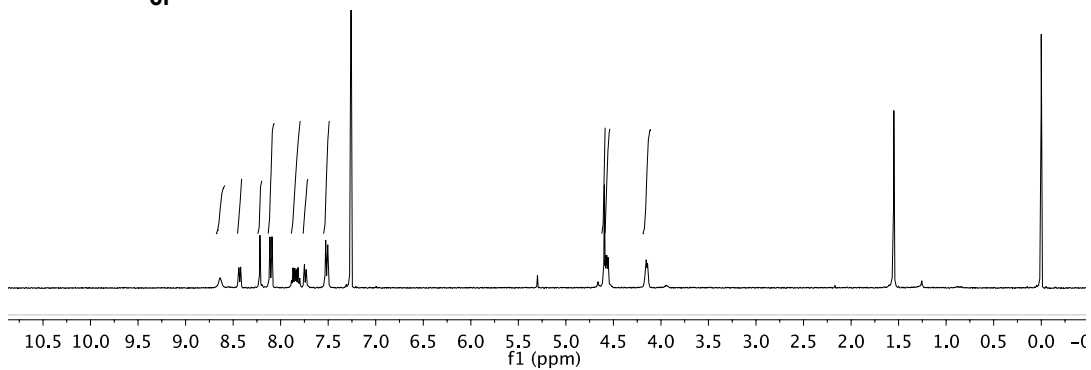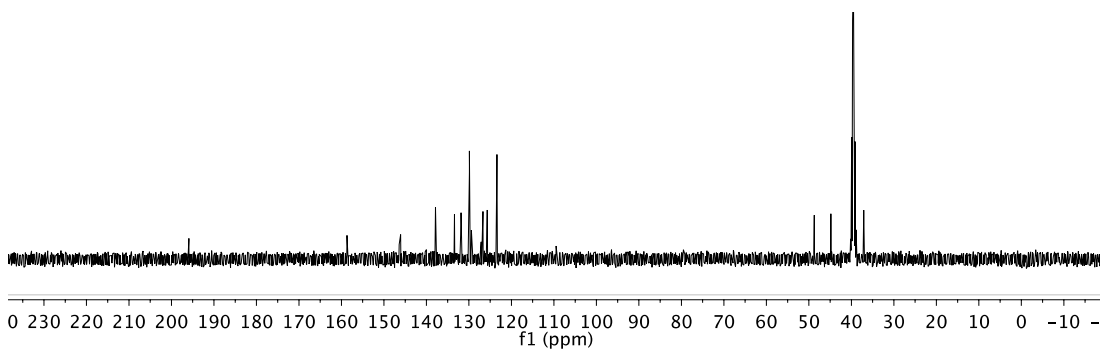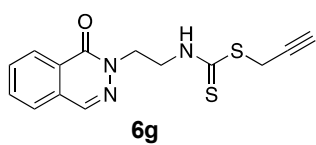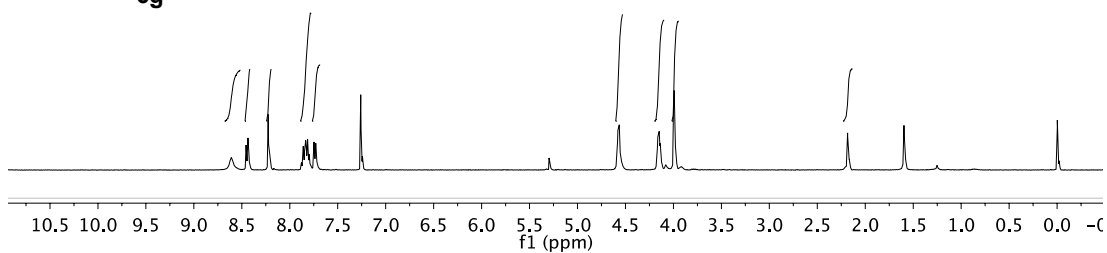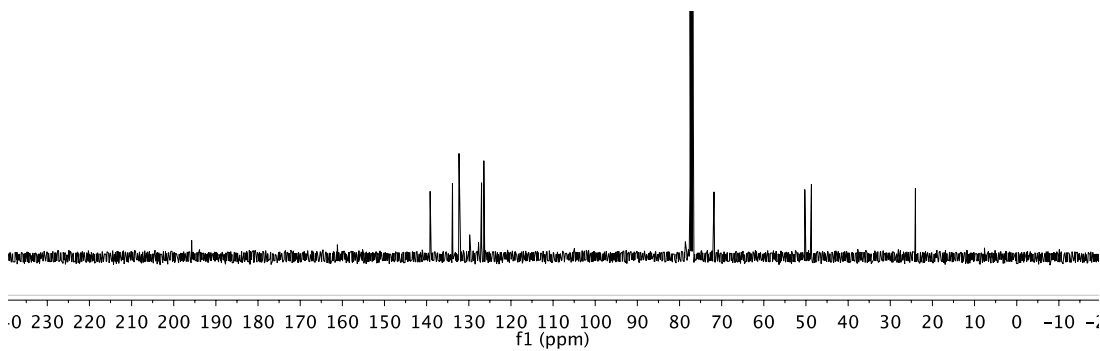

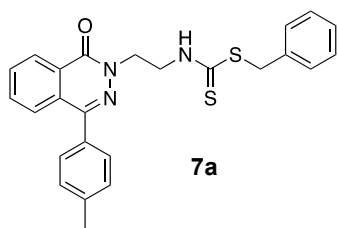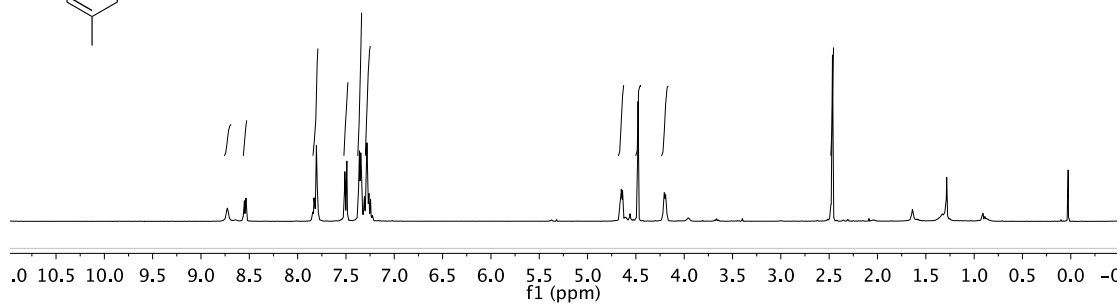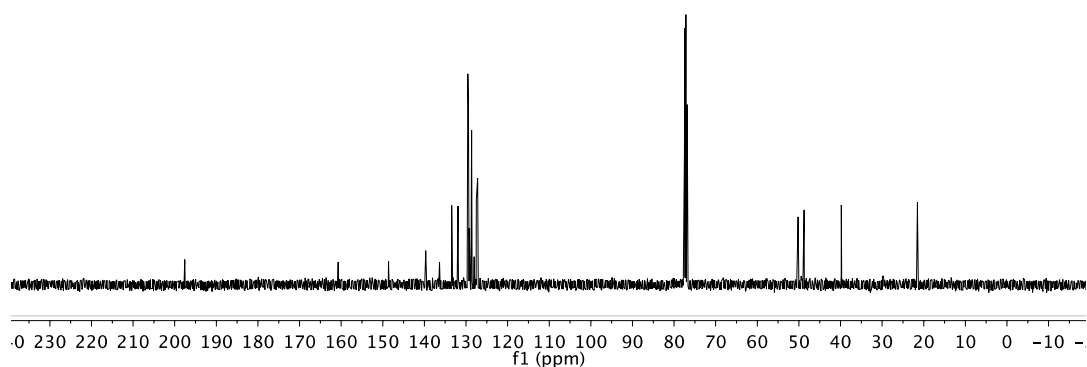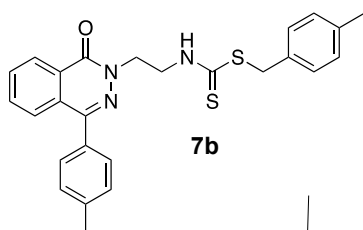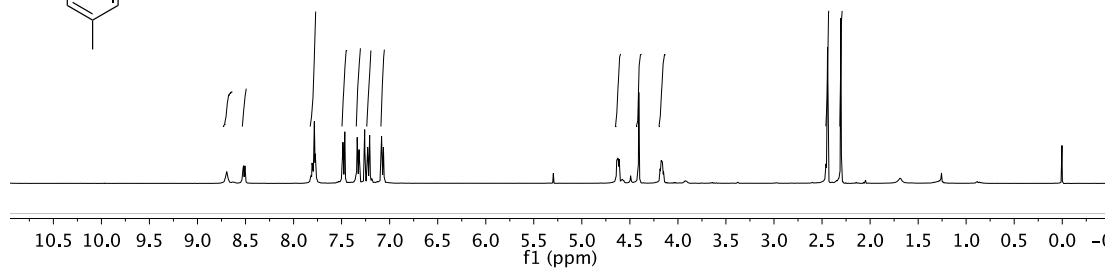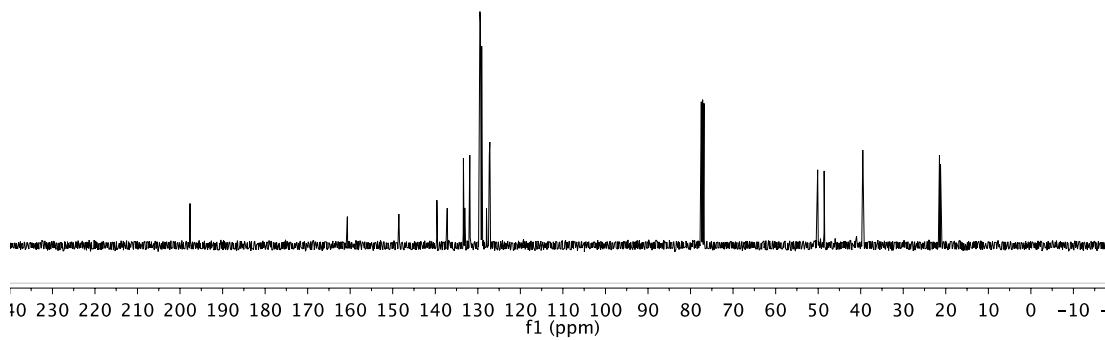

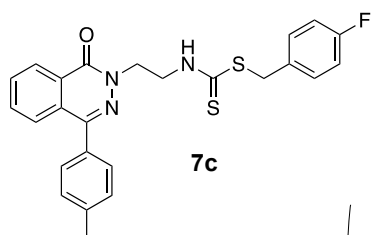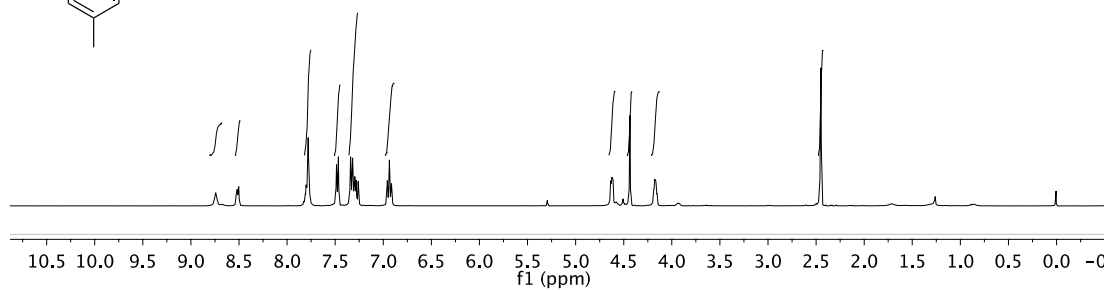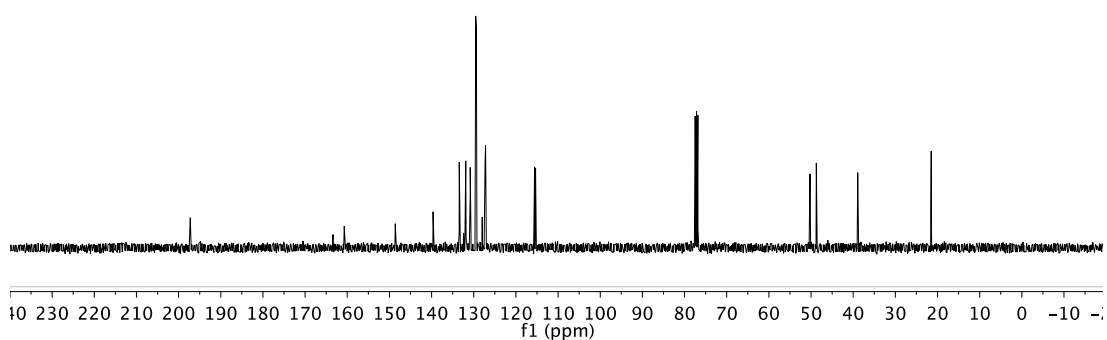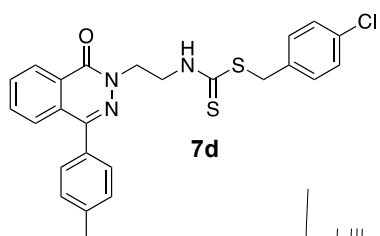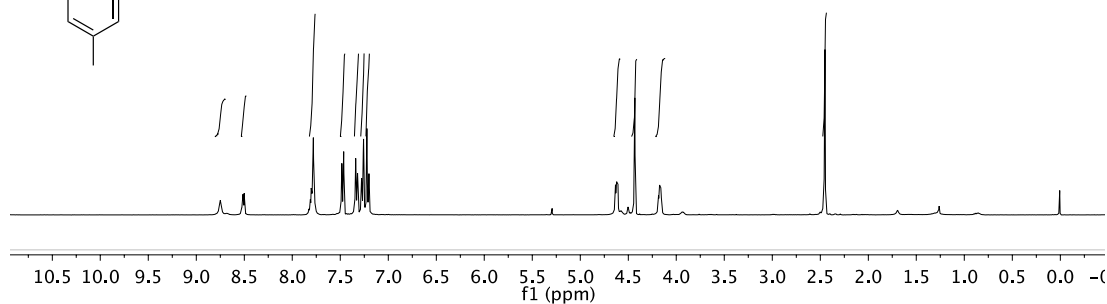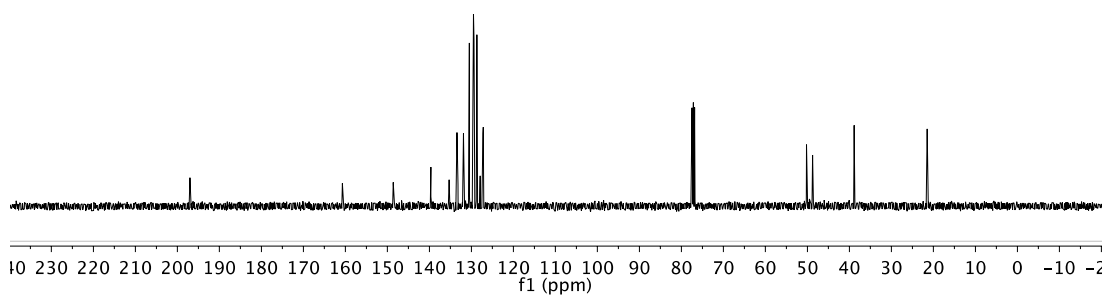



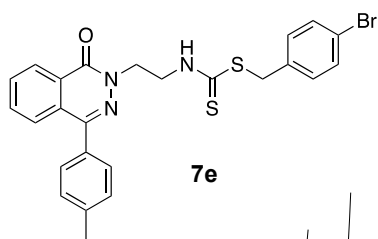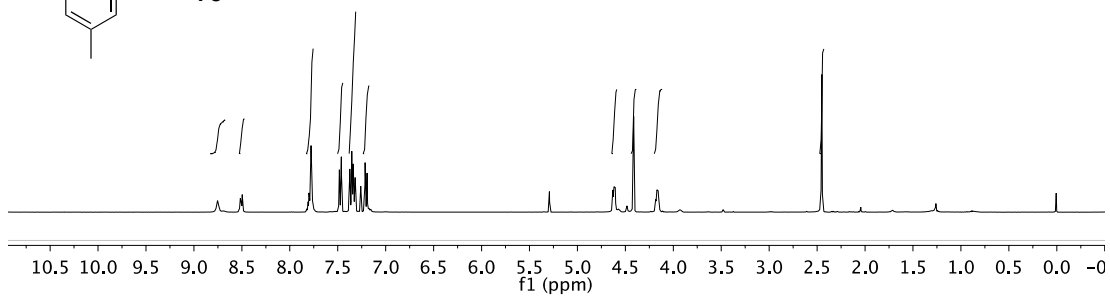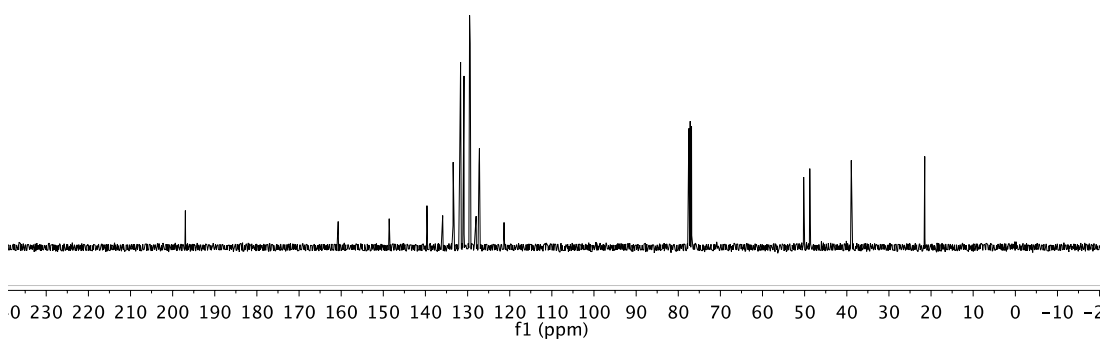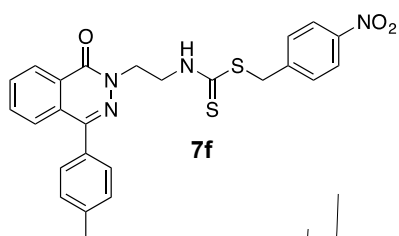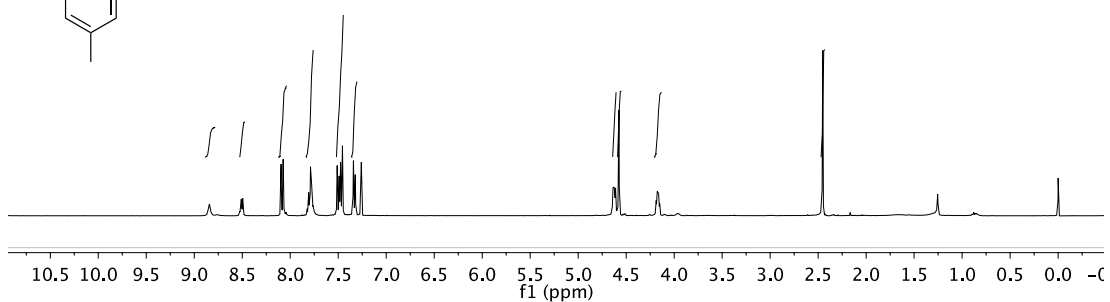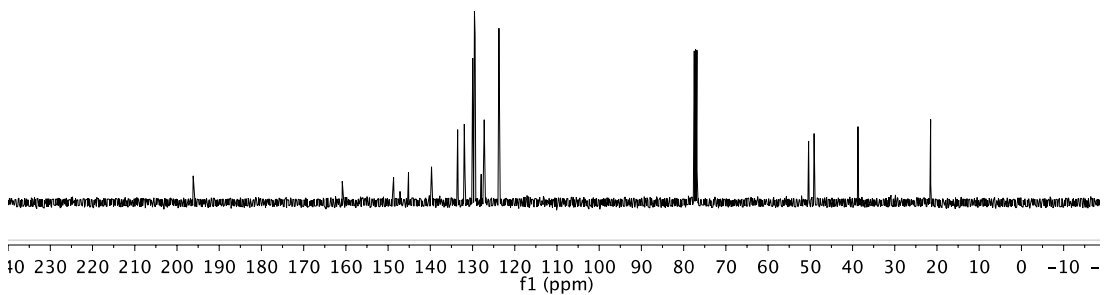

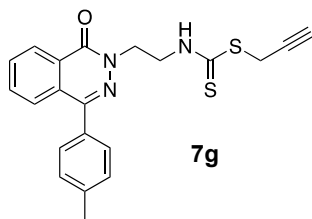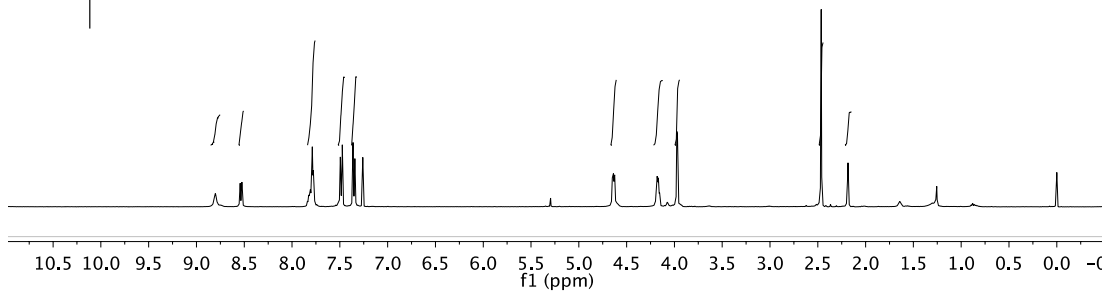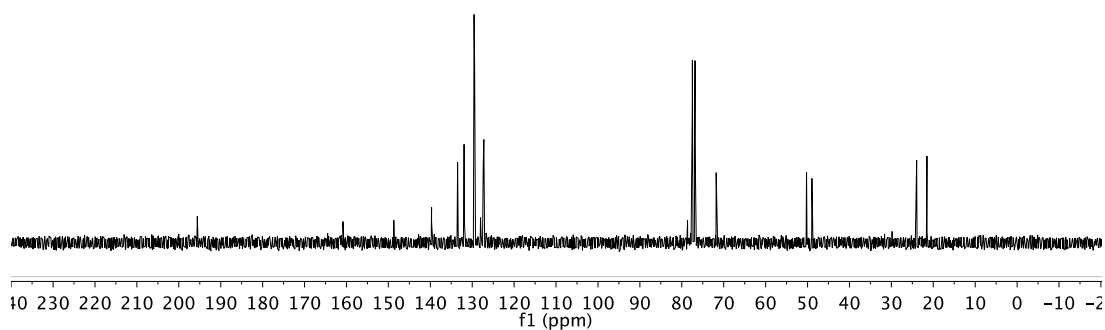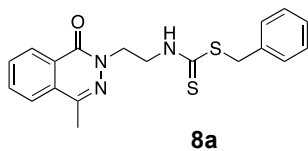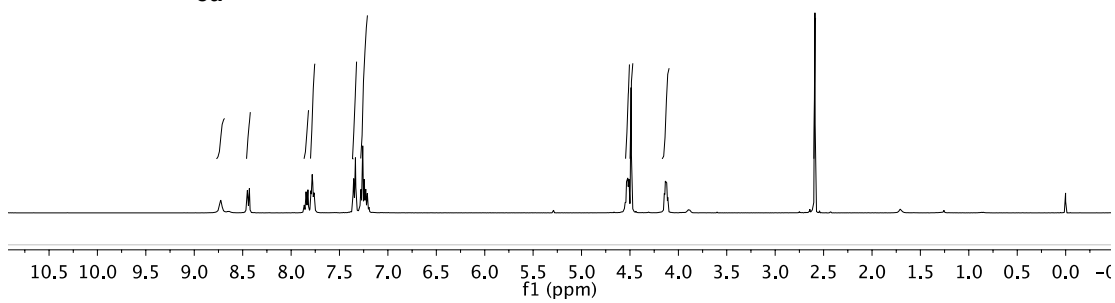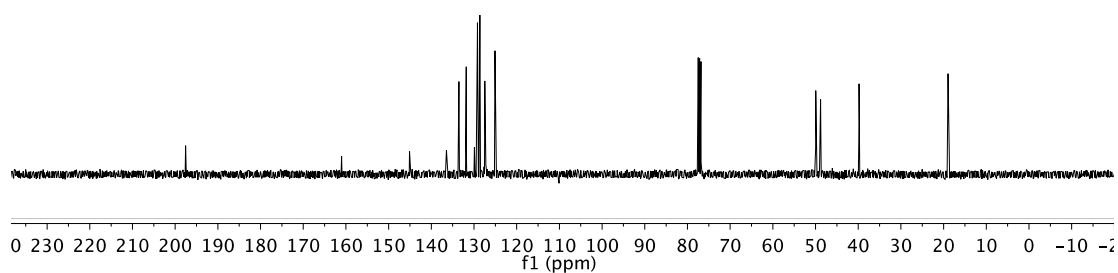

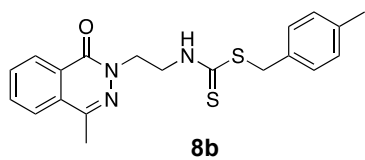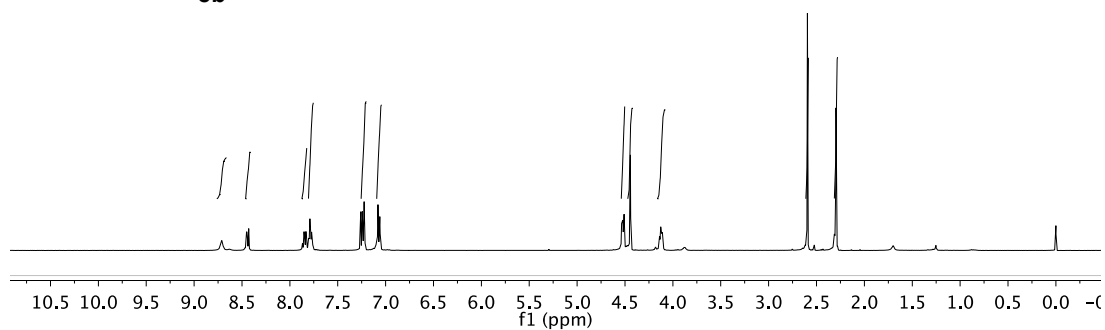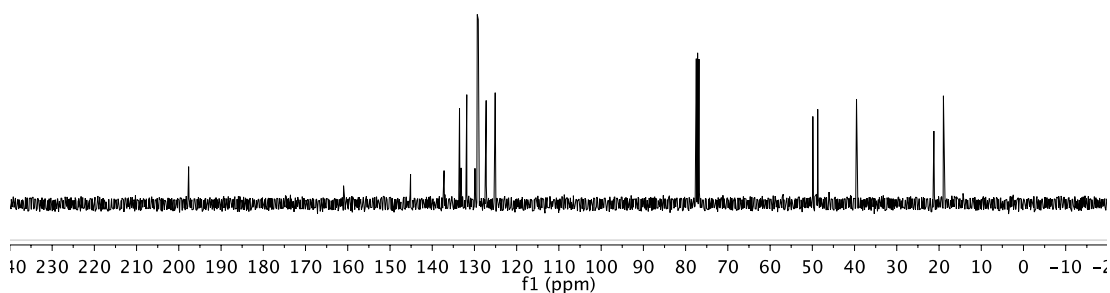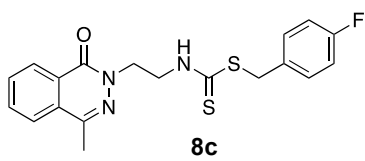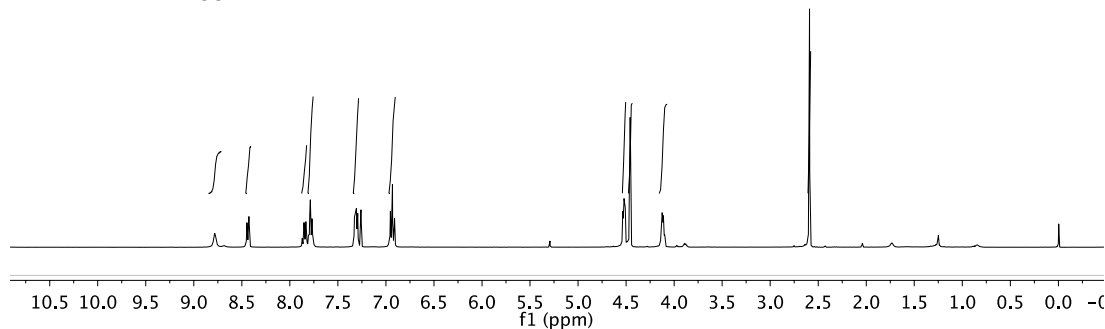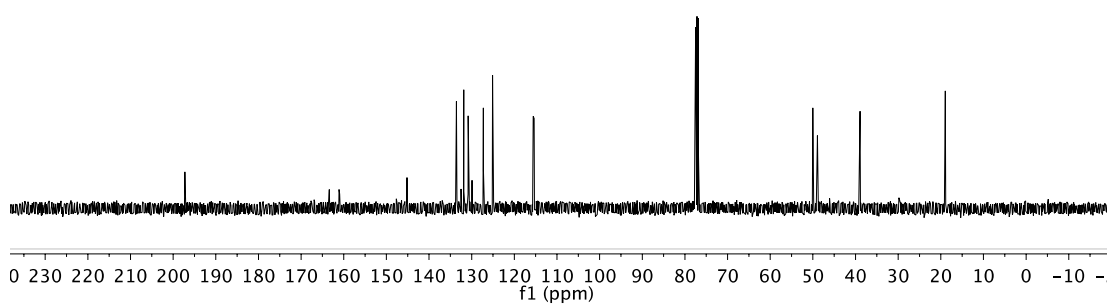

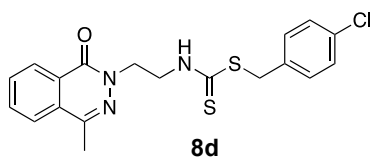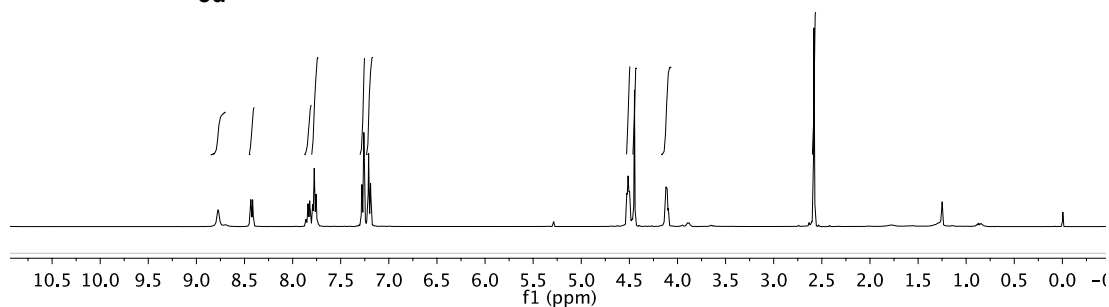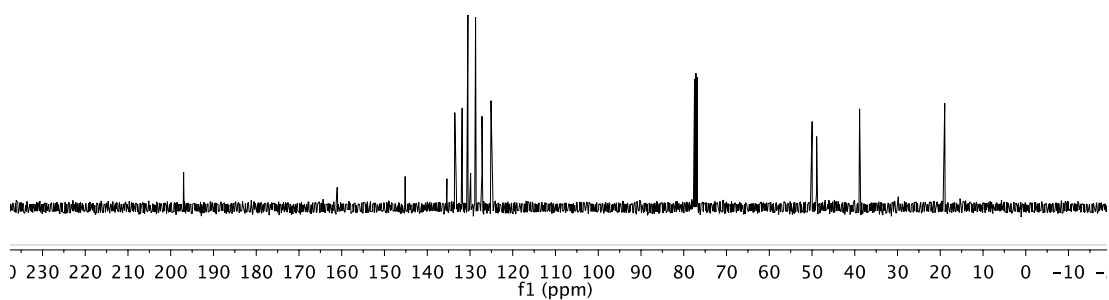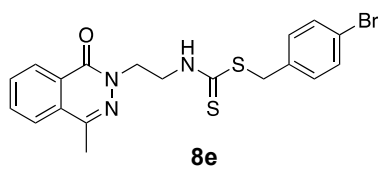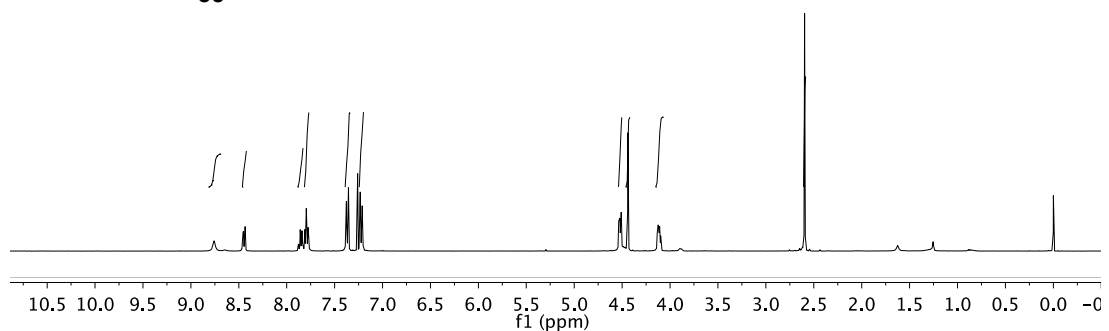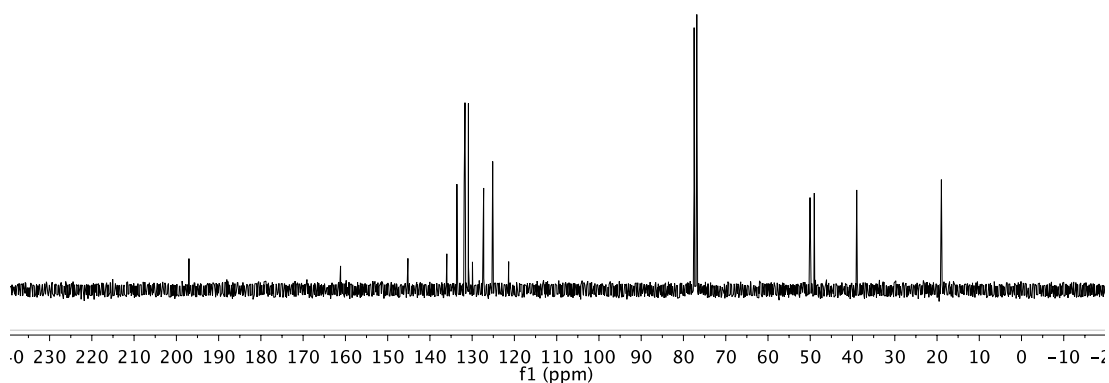

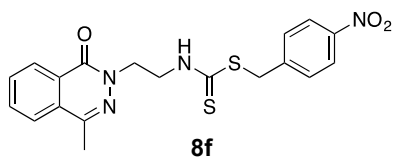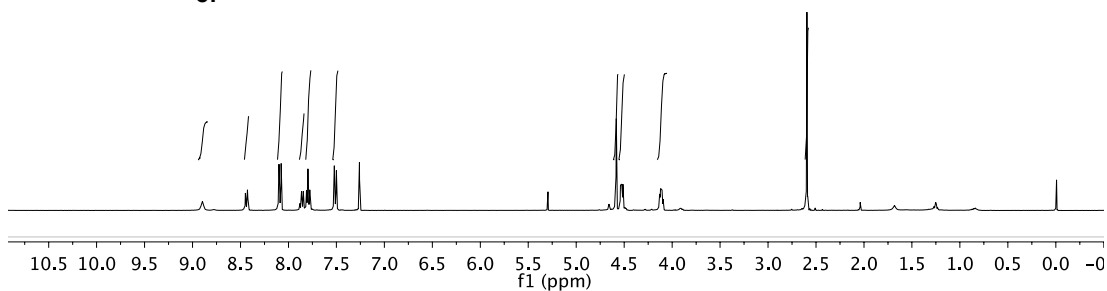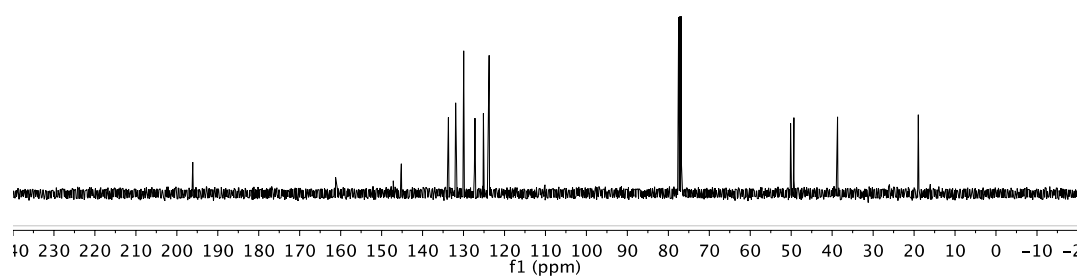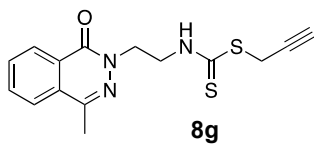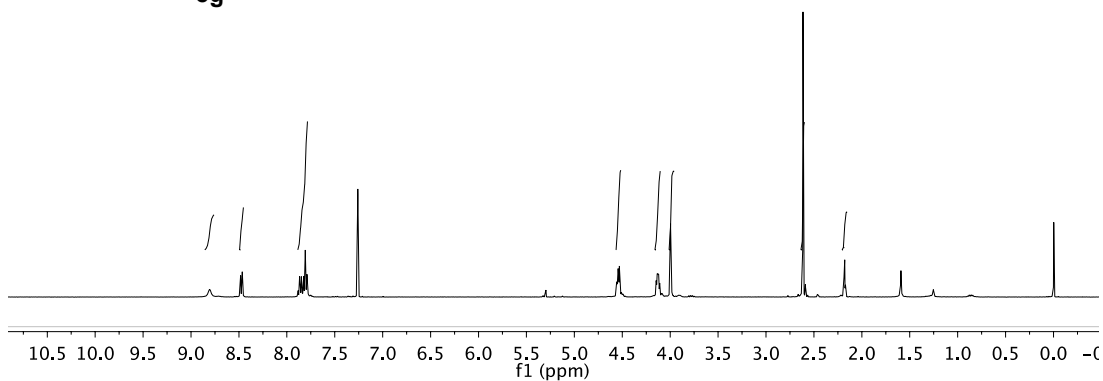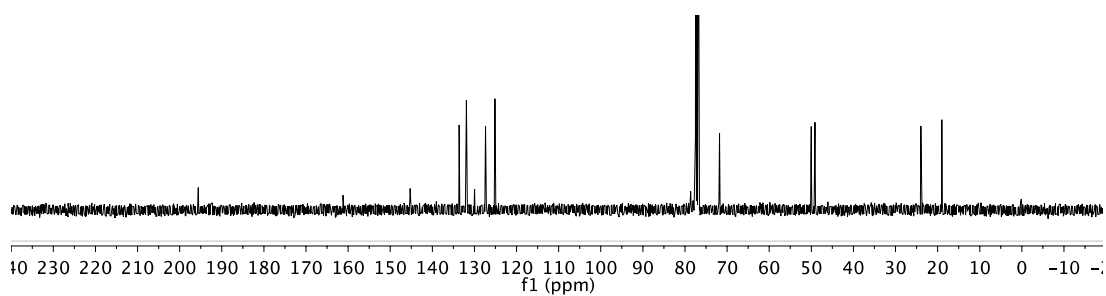

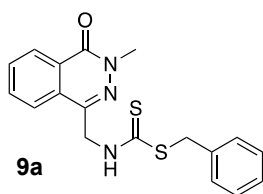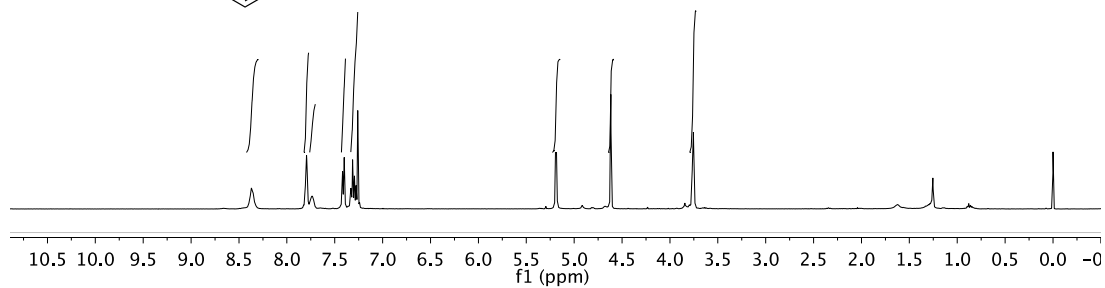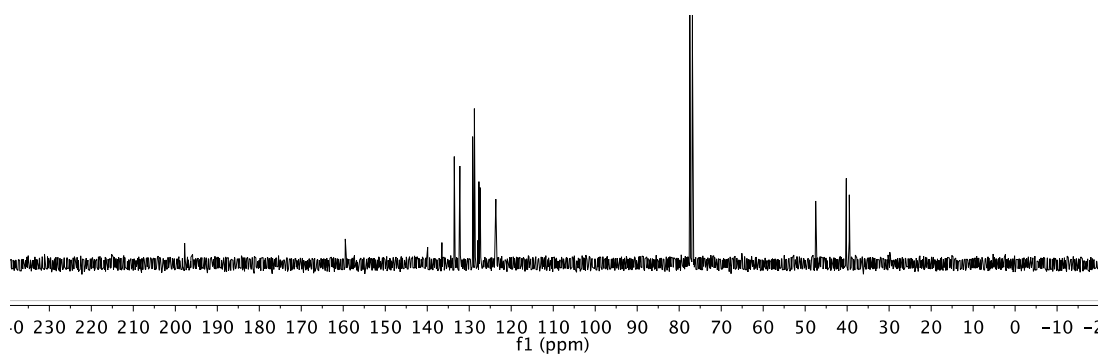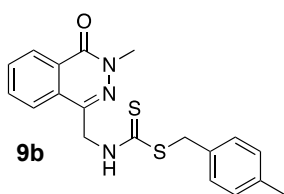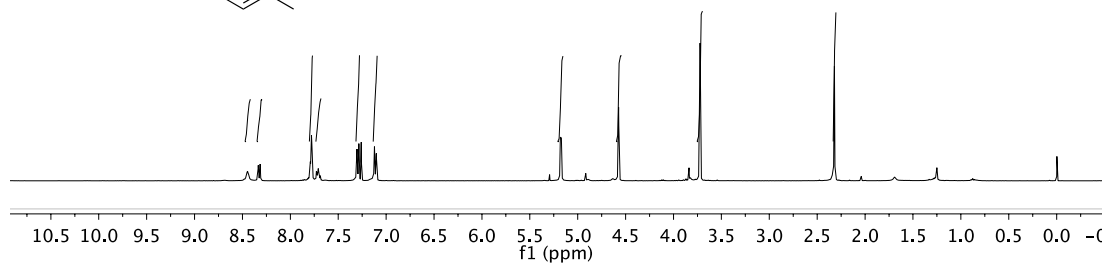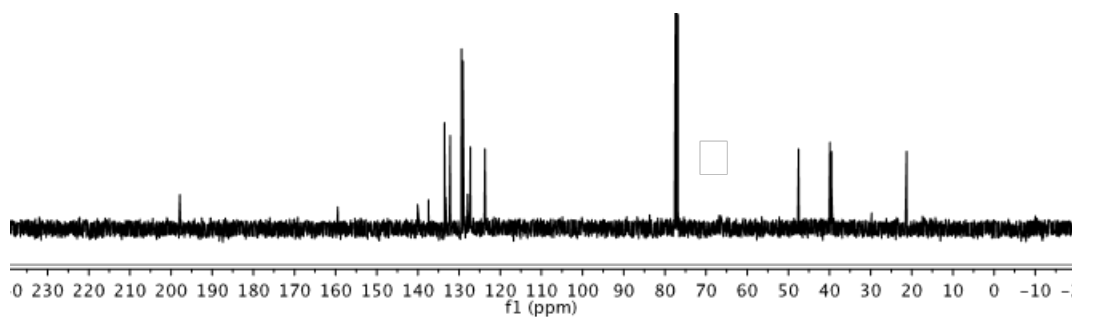

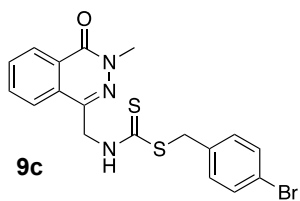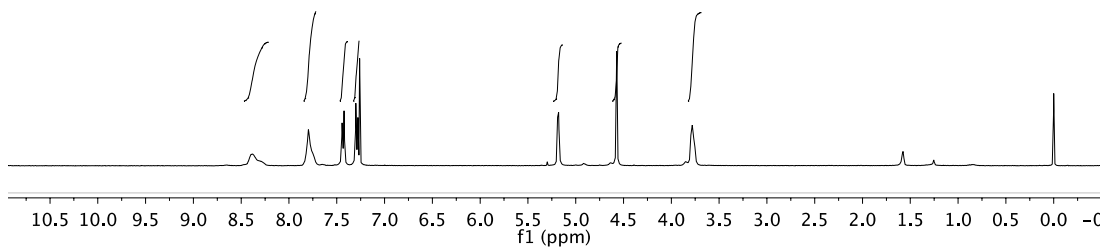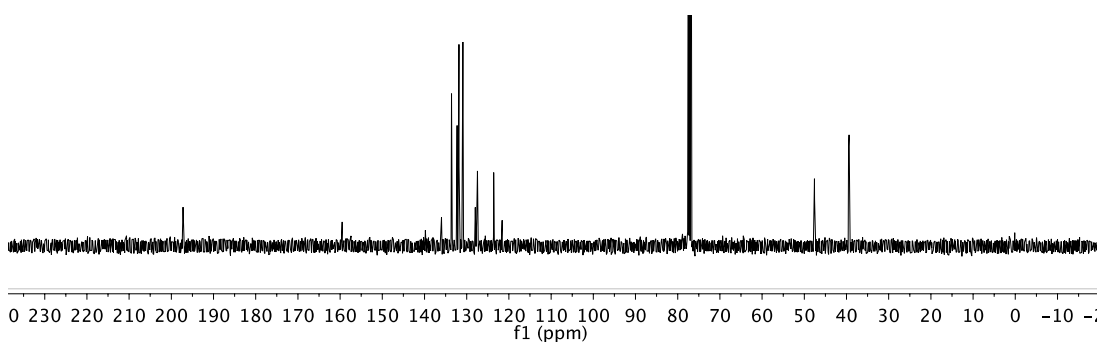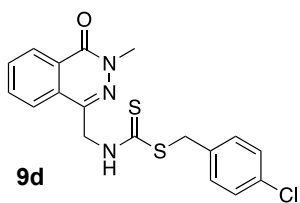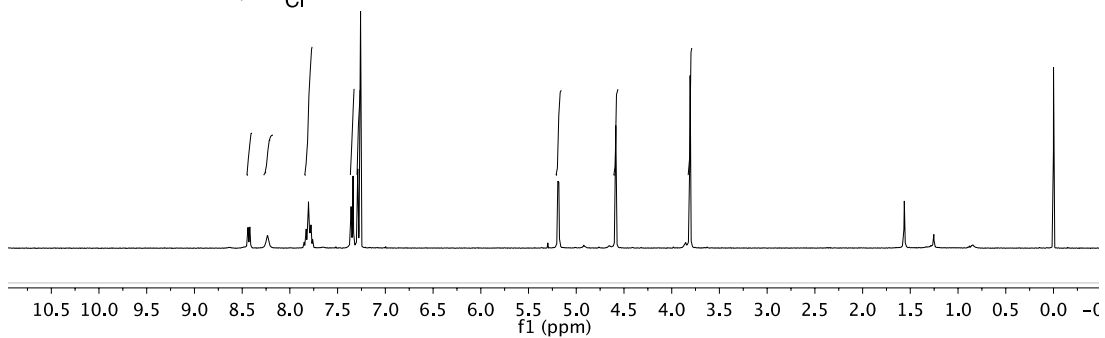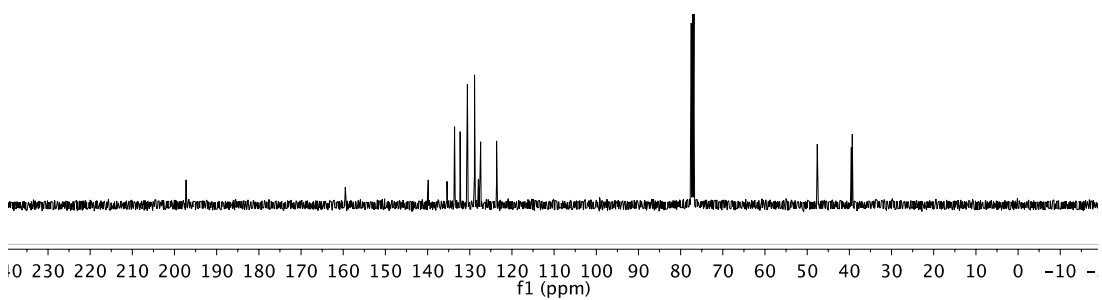

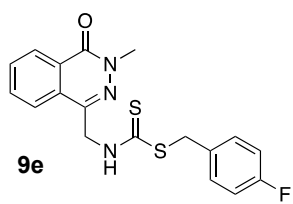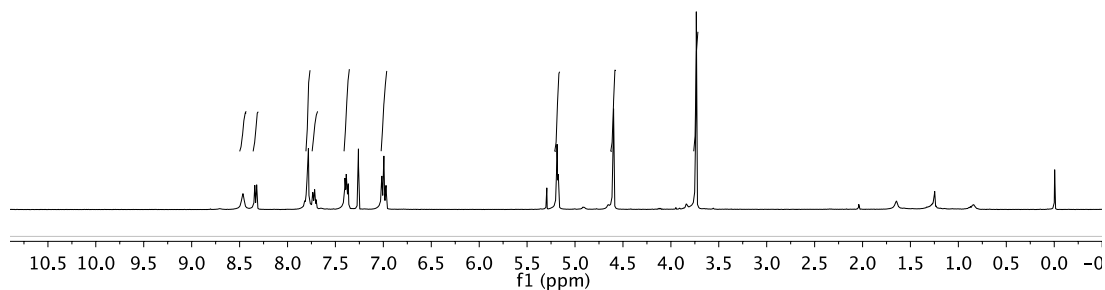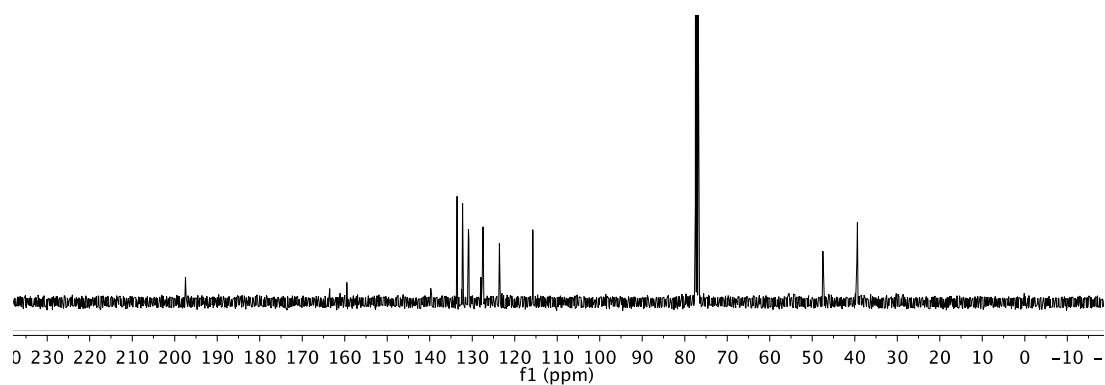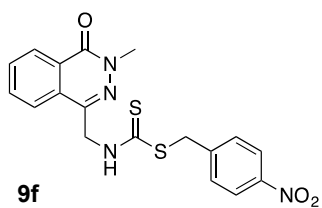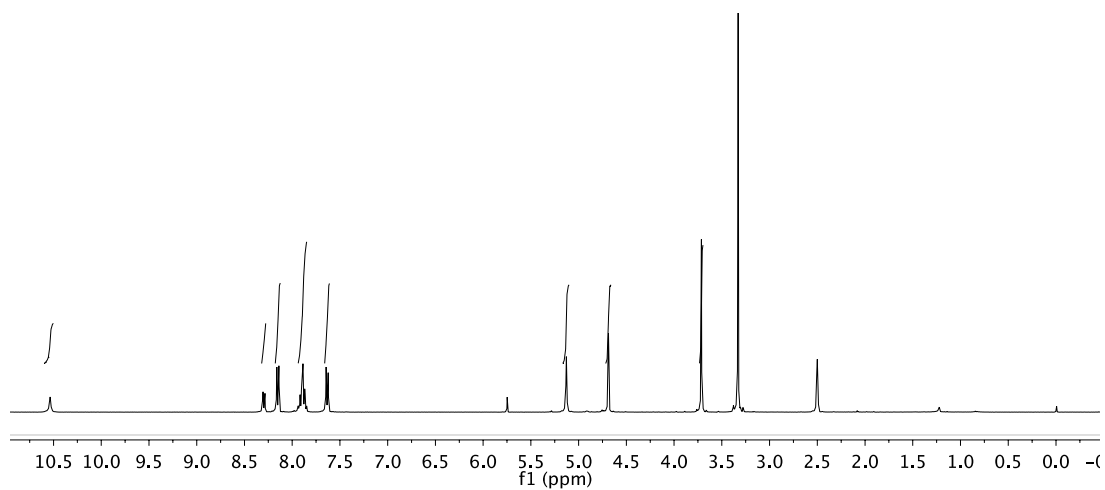



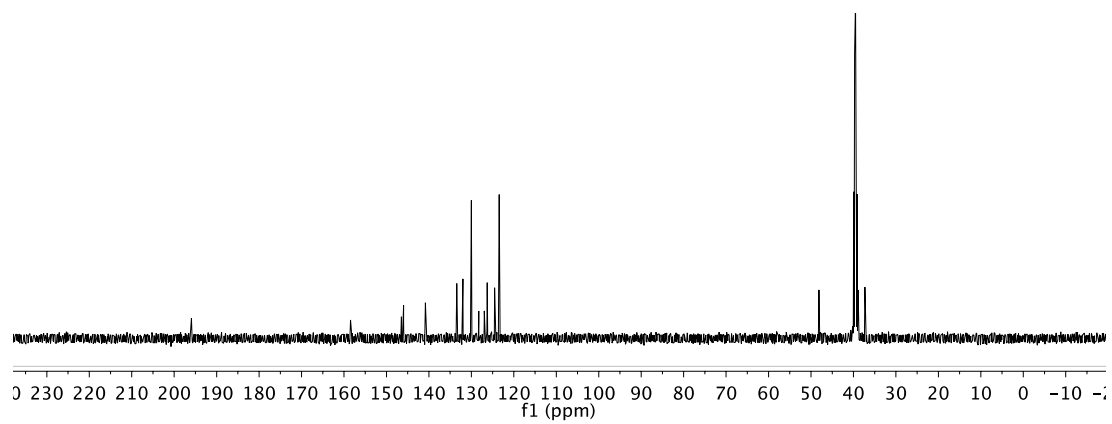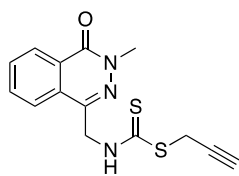

**9g**

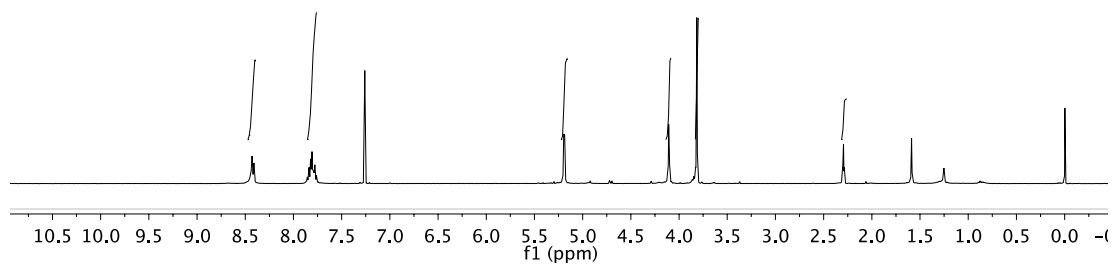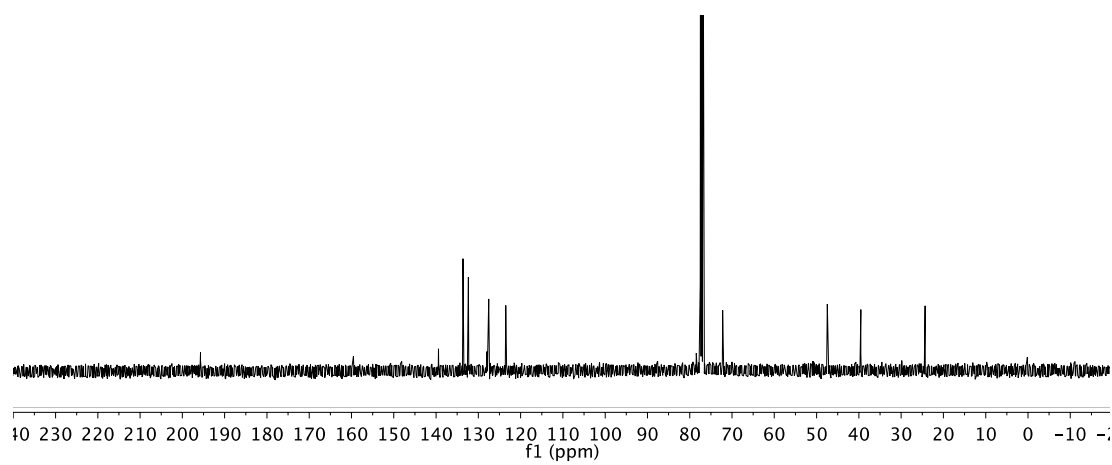

Supplement: s1 [file s1]
